# Supplementary material for: Association of Travel Distance to Nearest Abortion Facility With Rates of Abortion
Source: PubMed Central journal article supplement (PMC8261612; doi:10.1001/jamanetworkopen.2021.15530), 2021-07-06

## Supplementary Online Content

Thompson KMJ, Sturrock HJW, Foster DG, Upadhyay UD. Association of travel distance to nearest abortion facility with rates of abortion. *JAMA Netw Open*. 2021;4(7):e2115530. doi:10.1001/jamanetworkopen.2021.15530

**eTable 1.** Reported Abortions, Women of Reproductive Age, Median Abortion Rate, Median Travel Distance, and Median County Proportion of Female Residents With Selected Sociodemographic Characteristics, by US State (2015)

**eTable 2.** Estimated Increases in Abortions Under Travel Distance Scenarios, by Travel Distance to the Nearest Abortion Care Facility (n = 3107)

**eTable 3.** Sensitivity Analysis: Decline in County-Level Abortion Rate in a Spatial Poisson Model, by Travel Time to the Nearest Abortion Care Facility (n = 1948)

**eFigure 1.** Median Travel Distance in Miles to Closest Abortion Care Facility, by County (2015)

**eFigure 2.** Estimated Abortion Rate per 1000 Female Residents of Reproductive Age in a Scenario With a Maximum Travel Distance of 30 Miles, by County of Residence (2015)

**eFigure 3.** Estimated Abortion Rate per 1000 Female Residents of Reproductive Age in a Scenario With a Maximum Travel Distance of 5 Miles, by County of Residence (2015)

This supplementary material has been provided by the authors to give readers additional information about their work.

**eTable 1. Reported Abortions, Women of Reproductive Age, Median Abortion Rate, Median Travel Distance, and Median County Proportion of Female Residents With Selected Demographic Characteristics, by US State (2015)<sup>a</sup>**

| <b>State</b>   | <b>No. of counties</b> | <b>No. of abortions</b> | <b>No. of female residents of reproductive age</b> | <b>Median abortion rate<sup>b</sup></b> | <b>Median proportion ages 25 to 29</b> | <b>Median proportion Black or other race/ethnicity<sup>c</sup></b> | <b>Median proportion married<sup>d</sup></b> | <b>Median proportion with high school degree<sup>e</sup></b> | <b>Median proportion foreign born<sup>f</sup></b> | <b>Median proportion below federal poverty level<sup>g</sup></b> |
|----------------|------------------------|-------------------------|----------------------------------------------------|-----------------------------------------|----------------------------------------|--------------------------------------------------------------------|----------------------------------------------|--------------------------------------------------------------|---------------------------------------------------|------------------------------------------------------------------|
| Total          | 1 948                  | 428 720                 | 37 276 590                                         | 9.9                                     | 15.5                                   | 4.6                                                                | 51.5                                         | 27.0                                                         | 2.6                                               | 21.3                                                             |
| Alabama        | 67                     | 6 620                   | 961 050                                            | 5.5                                     | 15.9                                   | 24.7                                                               | 48.1                                         | 27.9                                                         | 1.7                                               | 25.7                                                             |
| Arizona        | 15                     | 12 640                  | 1 296 680                                          | 11.6                                    | 16.5                                   | 8.0                                                                | 49.6                                         | 26.5                                                         | 7.4                                               | 26.2                                                             |
| Colorado       | 64                     | 8 970                   | 1 072 350                                          | 8.8                                     | 15.8                                   | 3.2                                                                | 54.1                                         | 22.3                                                         | 5.2                                               | 19.0                                                             |
| Delaware       | 3                      | 2 890                   | 179 990                                            | 17.3                                    | 17.0                                   | 28.8                                                               | 46.3                                         | 24.8                                                         | 6.7                                               | 17.0                                                             |
| Georgia        | 159                    | 26 820                  | 2 099 370                                          | 14.2                                    | 15.5                                   | 29.5                                                               | 46.3                                         | 29.4                                                         | 2.8                                               | 27.1                                                             |
| Idaho          | 44                     | 1 690                   | 311 320                                            | 5.5                                     | 15.2                                   | 3.0                                                                | 57.4                                         | 30.4                                                         | 4.1                                               | 21.4                                                             |
| Illinois       | 53                     | 34 280                  | 2 499 310                                          | 9.9                                     | 15.7                                   | 7.1                                                                | 49.7                                         | 22.6                                                         | 2.4                                               | 20.1                                                             |
| Indiana        | 92                     | 9 550                   | 1 291 070                                          | 6.0                                     | 15.1                                   | 2.2                                                                | 52.7                                         | 29.0                                                         | 1.8                                               | 18.7                                                             |
| Kansas         | 105                    | 3 630                   | 558 930                                            | 6.8                                     | 15.6                                   | 2.8                                                                | 56.9                                         | 22.0                                                         | 2.2                                               | 18.4                                                             |
| Louisiana      | 64                     | 8 520                   | 939 820                                            | 8.0                                     | 16.9                                   | 32.7                                                               | 44.0                                         | 32.7                                                         | 1.4                                               | 26.0                                                             |
| Michigan       | 83                     | 26 280                  | 1 892 790                                          | 10.7                                    | 14.9                                   | 3.8                                                                | 52.8                                         | 26.6                                                         | 1.9                                               | 23.1                                                             |
| Minnesota      | 87                     | 9 230                   | 1 049 650                                          | 8.6                                     | 15.1                                   | 3.5                                                                | 55.9                                         | 22.7                                                         | 2.3                                               | 16.5                                                             |
| Mississippi    | 82                     | 4 700                   | 601 390                                            | 6.9                                     | 16.1                                   | 38.6                                                               | 43.4                                         | 27.6                                                         | 0.9                                               | 31.0                                                             |
| Missouri       | 115                    | 8 640                   | 1 175 400                                          | 5.7                                     | 15.7                                   | 3.0                                                                | 53.4                                         | 29.4                                                         | 1.2                                               | 23.6                                                             |
| Nebraska       | 57                     | 1 890                   | 351 450                                            | 6.2                                     | 14.9                                   | 2.0                                                                | 58.3                                         | 21.7                                                         | 2.2                                               | 17.1                                                             |
| New York       | 62                     | 88 760                  | 4 048 540                                          | 17.9                                    | 15.3                                   | 7.0                                                                | 47.0                                         | 23.8                                                         | 4.1                                               | 19.0                                                             |
| Ohio           | 88                     | 21 220                  | 2 214 450                                          | 8.7                                     | 15.3                                   | 4.2                                                                | 51.9                                         | 30.2                                                         | 1.5                                               | 21.3                                                             |
| Oregon         | 36                     | 7 850                   | 770 670                                            | 9.7                                     | 16.1                                   | 5.7                                                                | 51.3                                         | 27.0                                                         | 5.2                                               | 24.6                                                             |
| Pennsylvania   | 67                     | 32 030                  | 2 418 790                                          | 10.6                                    | 15.3                                   | 4.3                                                                | 50.8                                         | 31.8                                                         | 1.7                                               | 18.1                                                             |
| South Carolina | 46                     | 11 030                  | 937 780                                            | 12.1                                    | 15.9                                   | 35.1                                                               | 44.2                                         | 28.8                                                         | 2.4                                               | 27.2                                                             |
| South Dakota   | 18                     | 580                     | 124 330                                            | 4.1                                     | 16.3                                   | 5.8                                                                | 51.5                                         | 21.9                                                         | 1.9                                               | 16.5                                                             |

| State      | No. of counties | No. of abortions | No. of female residents of reproductive age | Median abortion rate <sup>b</sup> | Median proportion ages 25 to 29 | Median proportion Black or other race/ethnicity <sup>c</sup> | Median proportion married <sup>d</sup> | Median proportion with high school degree <sup>e</sup> | Median proportion foreign born <sup>f</sup> | Median proportion below federal poverty level <sup>g</sup> |
|------------|-----------------|------------------|---------------------------------------------|-----------------------------------|---------------------------------|--------------------------------------------------------------|----------------------------------------|--------------------------------------------------------|---------------------------------------------|------------------------------------------------------------|
| Texas      | 254             | 54 200           | 5 577 580                                   | 10.0                              | 15.6                            | 5.4                                                          | 52.1                                   | 28.4                                                   | 6.8                                         | 21.1                                                       |
| Utah       | 29              | 3 120            | 631 170                                     | 3.7                               | 14.7                            | 3.5                                                          | 58.8                                   | 26.4                                                   | 3.9                                         | 16.0                                                       |
| Vermont    | 14              | 1 120            | 116 670                                     | 9.5                               | 15.0                            | 3.3                                                          | 49.8                                   | 28.1                                                   | 3.8                                         | 17.4                                                       |
| Virginia   | 133             | 18 500           | 1 677 520                                   | 8.6                               | 15.6                            | 16.0                                                         | 50.0                                   | 27.4                                                   | 3.0                                         | 18.2                                                       |
| Washington | 39              | 17 230           | 1 390 380                                   | 12.2                              | 16.2                            | 7.3                                                          | 51.5                                   | 26.1                                                   | 7.0                                         | 21.7                                                       |
| Wisconsin  | 72              | 6 720            | 1 088 170                                   | 5.2                               | 14.9                            | 3.1                                                          | 55.2                                   | 26.6                                                   | 2.2                                         | 16.7                                                       |

<sup>a</sup> Columns may not sum to total due to rounding.

<sup>b</sup> Rates are population-weighted median per 1000 female residents aged 15 to 44.

<sup>c</sup> Includes Asian, Native American, Alaska Native, Native Hawaiian, Pacific Islander, and multiracial residents. Denominator is female residents aged 15 to 44.

<sup>d</sup> Denominator is female residents over age 18.

<sup>e</sup> HS = High school or equivalent degree. Denominator is female residents aged 18 to 44.

<sup>f</sup> Denominator is all female residents.

<sup>g</sup> Denominator is households with female residents aged 15 to 44.

**eTable 2. Estimated Increases in Abortions Under Travel Distance Scenarios, by Travel Distance to the Nearest Abortion Care Facility (n = 3107)**

| Travel distance, miles <sup>a</sup> | No. of counties | No. of female residents of reproductive age <sup>b</sup> | Actual travel distance | Travel distance scenario <30 m | Travel distance scenario <5 m |                  |                             |
|-------------------------------------|-----------------|----------------------------------------------------------|------------------------|--------------------------------|-------------------------------|------------------|-----------------------------|
|                                     |                 |                                                          | No. of abortions       | No. of abortions               | No. of additional abortions   | No. of abortions | No. of additional abortions |
| Total                               | 3 107           | 62 539 010                                               | 696 470                | 714 660                        | 18 190                        | 767 390          | 70 920                      |
| <5                                  | 107             | 16 903 950                                               | 289 790                | 289 790                        | NA                            | 289 790          | NA                          |
| 5 to <15                            | 261             | 22 987 240                                               | 270 550                | 270 550                        | NA                            | 285 360          | 14 810                      |
| 15 to <30                           | 282             | 6 922 720                                                | 52 980                 | 52 980                         | NA                            | 66 000           | 13 020                      |
| 30 to <60                           | 806             | 7 208 400                                                | 41 800                 | 47 320                         | 5 510                         | 58 940           | 17 140                      |
| 60 to <120                          | 1 089           | 6 705 880                                                | 34 520                 | 42 690                         | 8 170                         | 53 180           | 18 660                      |
| ≥120                                | 562             | 1 810 820                                                | 6 830                  | 11 330                         | 4 510                         | 14 120           | 7 290                       |

Abbreviation: NA, not applicable.

<sup>a</sup> To convert to kilometers, multiply by 1.6.

<sup>b</sup> Includes women and girls aged 15 to 44 years.

**eTable 3. Sensitivity Analysis: Decline in County-Level Abortion Rate in a Spatial Poisson Model, by Travel Time to the Nearest Abortion Care Facility (n = 1948)**

| Travel time, minutes | No. of counties | No, of female residents of reproductive age <sup>a</sup> | No. of abortions | Median abortion rate <sup>b</sup> | Range        | Coefficient (95% CI)   |                        |
|----------------------|-----------------|----------------------------------------------------------|------------------|-----------------------------------|--------------|------------------------|------------------------|
|                      |                 |                                                          |                  |                                   |              | Unadjusted             | Adjusted <sup>c</sup>  |
| <5                   | 5               | 1 248 140                                                | 40 270           | 28.3                              | 25.1 to 63.6 | 1 [Reference]          | 1 [Reference]          |
| 5 to <15             | 133             | 14 650 660                                               | 229 090          | 14.2                              | 1.0 to 35.0  | 0.58 (0.52 to 0.64)    | -0.41 (-0.50 to -0.32) |
| 15 to <30            | 117             | 7 199 940                                                | 74 310           | 10.0                              | 0.7 to 19.6  | 0.24 (0.18 to 0.30)    | -0.43 (-0.52 to -0.33) |
| 30 to <60            | 371             | 5 937 640                                                | 40 950           | 6.7                               | 0.2 to 22.9  | -0.05 (-0.11 to 0.01)  | -0.64 (-0.74 to -0.54) |
| 60 to <120           | 779             | 5 634 540                                                | 32 130           | 5.3                               | 0 to 19.3    | -0.10 (-0.17 to -0.04) | -0.75 (-0.85 to -0.65) |
| ≥120                 | 543             | 2 605 680                                                | 11 970           | 4.3                               | 0 to 13.0    | -0.13 (-0.20 to -0.05) | -0.76 (-0.87 to -0.65) |

<sup>a</sup> Includes women and girls aged 15 to 44 years.

<sup>b</sup> Indicates population-weighted travel time category median per 1000 women aged 15 to 44 years.

<sup>c</sup> Adjusted for county-level proportion of female residents aged 25 to 29, Black or other race/ethnicity, married, high school degree or equivalent, foreign-born residents, households below the federal poverty level, and state abortion policies.

**eFigure 1. Median Travel Distance in Miles to Closest Abortion Care Facility, by County (2015)**

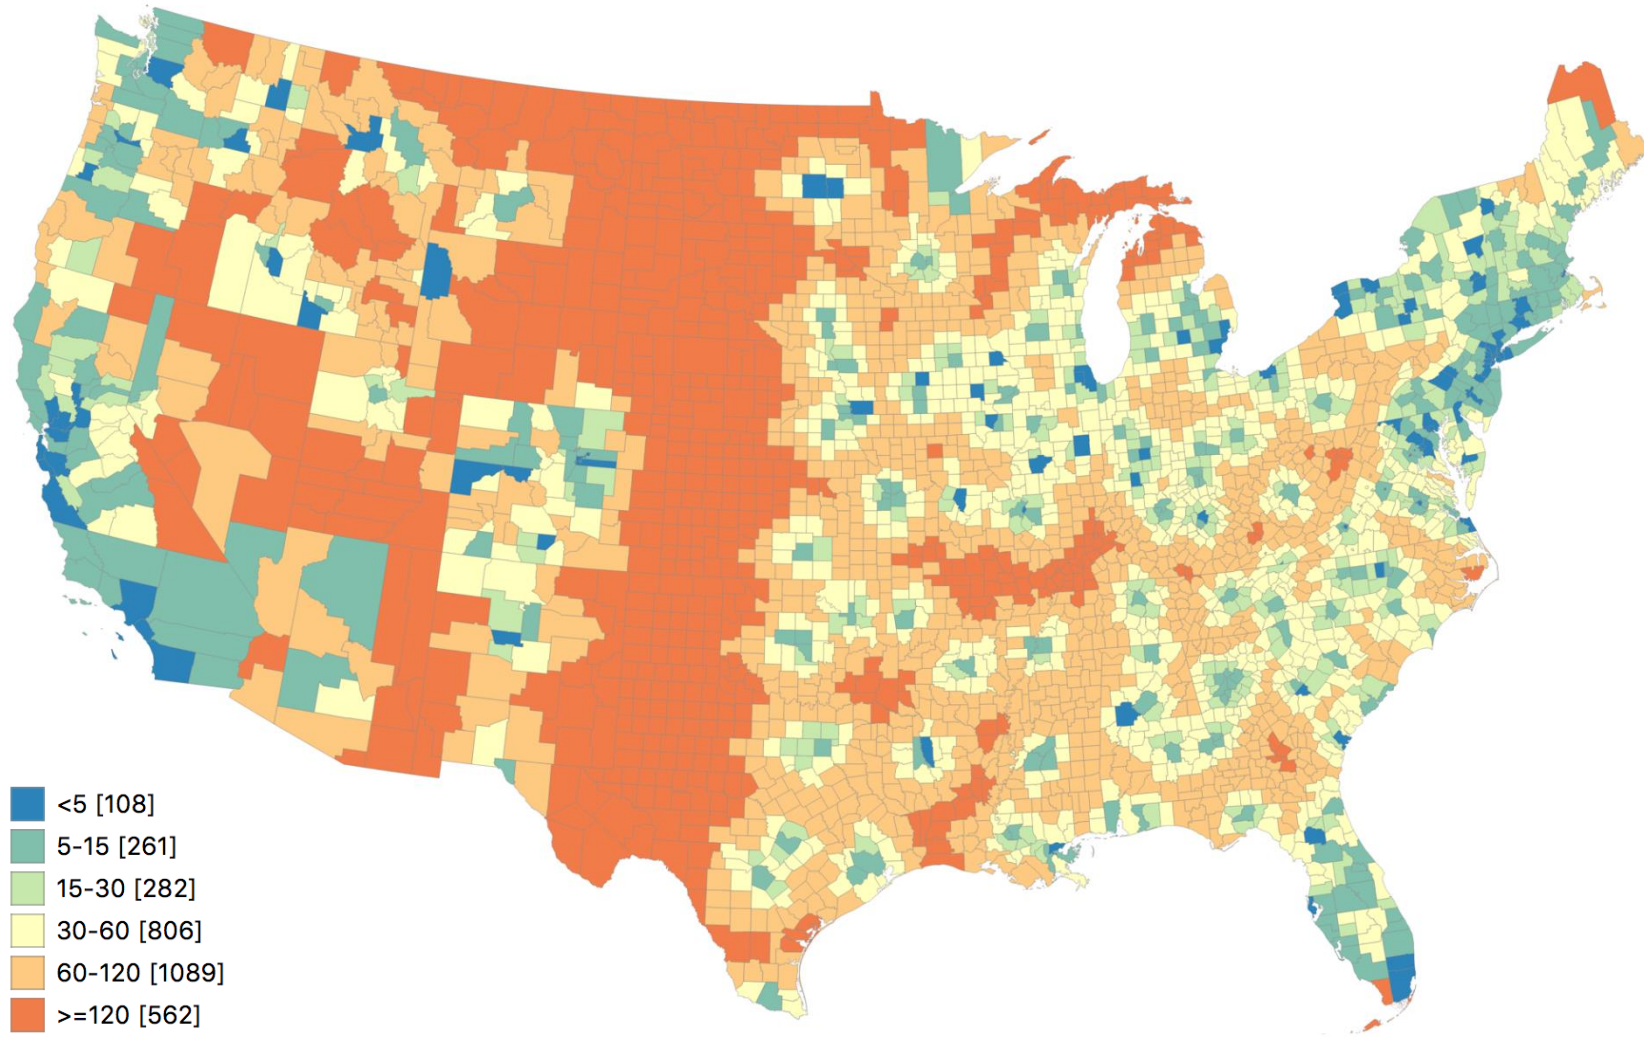

Note: Conversion factor from miles to kilometers is 1.6.

**eFigure 2. Estimated Abortion Rate per 1000 Female Residents of Reproductive Age in a Scenario With a Maximum Travel Distance of 30 Miles, by County of Residence (2015)**

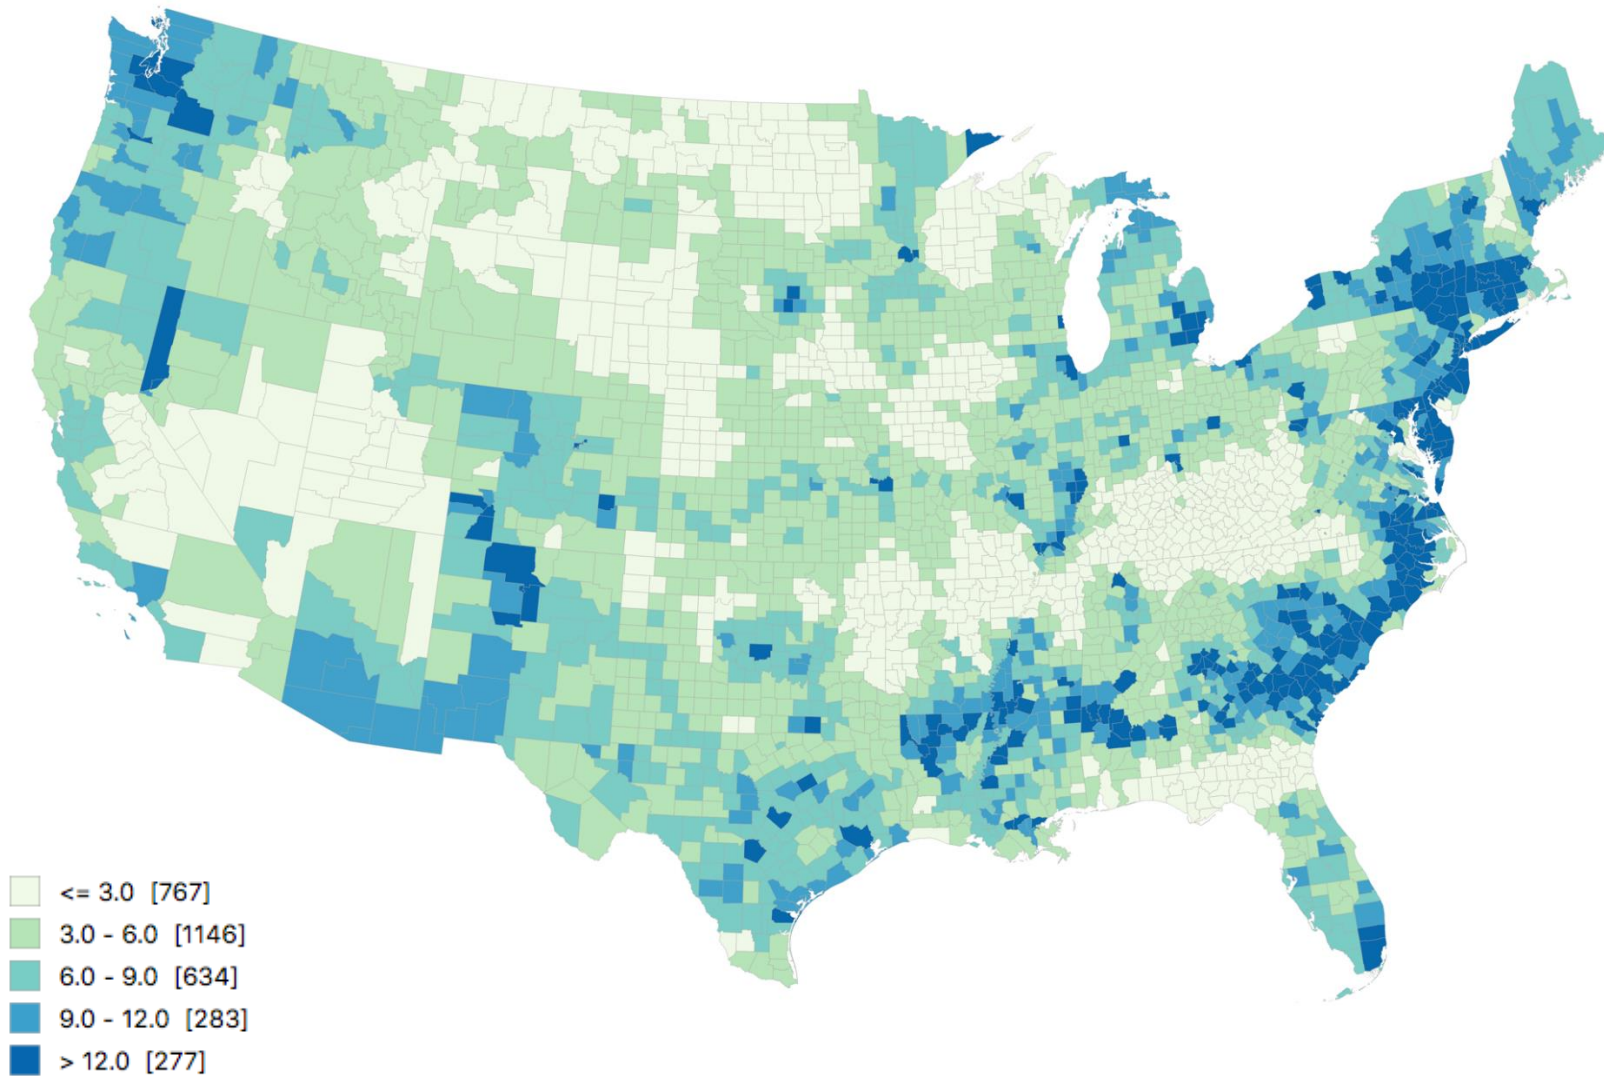

**eFigure 3. Estimated Abortion Rate per 1000 Female Residents of Reproductive Age in a Scenario With a Maximum Travel Distance of 5 Miles, by County of Residence (2015)**

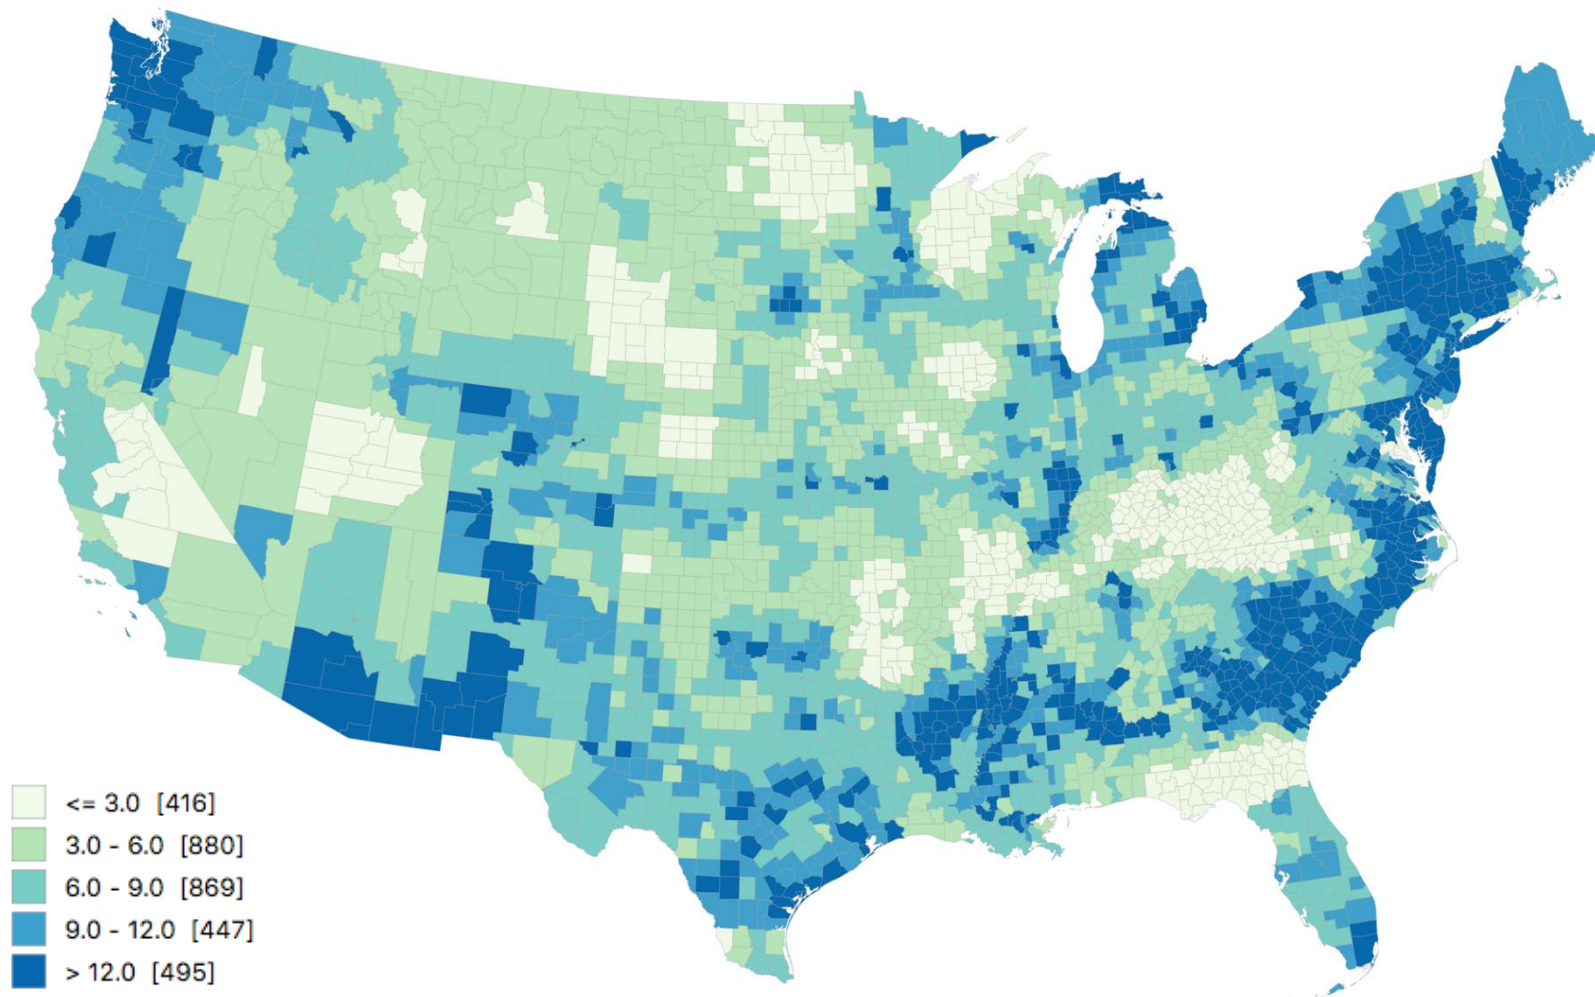

Supplement: jamanetwopen-e2115530-s001.pdf [file jamanetwopen-e2115530-s001.pdf]
